# Supplementary material for: Transannular patch repair of tetralogy of Fallot with or without monocusp valve reconstruction: a meta-analysis
Source: Springer Nature journal article supplement (doi:10.1186/s12893-022-01474-6), 2022-01-16
Supplement: MOESM1 [file 20036448]

## Risk of bias summary: assessment of RCTs

|                                                           | RCTs           |                 |
|-----------------------------------------------------------|----------------|-----------------|
|                                                           | Rawat, S. 2021 | Samadi, M. 2020 |
| Random sequence generation<br>(selection bias)            | Low risk       | Low risk        |
| Allocation concealment (selection bias)                   | Low risk       | Low risk        |
| Blinding of participants and personnel (performance bias) | Unclear risk   | Unclear risk    |
| Blinding of outcome assessment<br>(detection bias)        | Unclear risk   | Unclear risk    |
| Incomplete outcome data<br>(attrition bias)               | Low risk       | Low risk        |
| Selective reporting (reporting bias)                      | Low risk       | Low risk        |
| Other bias                                                | Low risk       | Low risk        |
