# Supplementary material for: Transannular patch repair of tetralogy of Fallot with or without monocusp valve reconstruction: a meta-analysis
Source: Springer Nature journal article supplement (doi:10.1186/s12893-022-01474-6), 2022-01-16
Supplement: MOESM2 [file 20036448]

| <b>TAP with monocusp compared to TAP without monocusp for TOF patients with severe stenosis of RVOT</b>                                                                                                                                                                                                        |                                          |                                                                                                                                      |                                  |                              |                                 |          |
|----------------------------------------------------------------------------------------------------------------------------------------------------------------------------------------------------------------------------------------------------------------------------------------------------------------|------------------------------------------|--------------------------------------------------------------------------------------------------------------------------------------|----------------------------------|------------------------------|---------------------------------|----------|
| <b>Patient or population:</b> TOF patients with severe stenosis of RVOT                                                                                                                                                                                                                                        |                                          |                                                                                                                                      |                                  |                              |                                 |          |
| <b>Settings:</b>                                                                                                                                                                                                                                                                                               |                                          |                                                                                                                                      |                                  |                              |                                 |          |
| <b>Intervention:</b> TAP with monocusp                                                                                                                                                                                                                                                                         |                                          |                                                                                                                                      |                                  |                              |                                 |          |
| <b>Comparison:</b> TAP without monocusp                                                                                                                                                                                                                                                                        |                                          |                                                                                                                                      |                                  |                              |                                 |          |
| Outcomes                                                                                                                                                                                                                                                                                                       | Illustrative comparative risks* (95% CI) |                                                                                                                                      | Relative effect (95% CI)         | No of Participants (studies) | Quality of the evidence (GRADE) | Comments |
|                                                                                                                                                                                                                                                                                                                | Assumed risk<br>TAP without monocusp     | Corresponding risk<br>TAP with monocusp                                                                                              |                                  |                              |                                 |          |
| Early death/ Inpatient mortality                                                                                                                                                                                                                                                                               | <b>Study population</b>                  |                                                                                                                                      | <b>OR 0.69</b><br>(0.2 to 2.41)  | 661<br>(10 studies)          | ⊕⊕⊕⊖<br>low                     |          |
|                                                                                                                                                                                                                                                                                                                | <b>19 per 1000</b>                       | <b>13 per 1000</b><br>(4 to 45)                                                                                                      |                                  |                              |                                 |          |
|                                                                                                                                                                                                                                                                                                                | <b>Moderate</b>                          |                                                                                                                                      |                                  |                              |                                 |          |
|                                                                                                                                                                                                                                                                                                                | <b>0 per 1000</b>                        | <b>0 per 1000</b><br>(0 to 0)                                                                                                        |                                  |                              |                                 |          |
| *The basis for the <b>assumed risk</b> (e.g. the median control group risk across studies) is provided in footnotes. The <b>corresponding risk</b> (and its 95% confidence interval) is based on the assumed risk in the comparison group and the <b>relative effect</b> of the intervention (and its 95% CI). |                                          |                                                                                                                                      |                                  |                              |                                 |          |
| CI: Confidence interval; OR: Odds ratio;                                                                                                                                                                                                                                                                       |                                          |                                                                                                                                      |                                  |                              |                                 |          |
| GRADE Working Group grades of evidence                                                                                                                                                                                                                                                                         |                                          |                                                                                                                                      |                                  |                              |                                 |          |
| <b>High quality:</b> Further research is very unlikely to change our confidence in the estimate of effect.                                                                                                                                                                                                     |                                          |                                                                                                                                      |                                  |                              |                                 |          |
| <b>Moderate quality:</b> Further research is likely to have an important impact on our confidence in the estimate of effect and may change the estimate.                                                                                                                                                       |                                          |                                                                                                                                      |                                  |                              |                                 |          |
| <b>Low quality:</b> Further research is very likely to have an important impact on our confidence in the estimate of effect and is likely to change the estimate.                                                                                                                                              |                                          |                                                                                                                                      |                                  |                              |                                 |          |
| <b>Very low quality:</b> We are very uncertain about the estimate.                                                                                                                                                                                                                                             |                                          |                                                                                                                                      |                                  |                              |                                 |          |
| <b>TAP with monocusp compared to TAP without monocusp for TOF patients with severe stenosis of RVOT</b>                                                                                                                                                                                                        |                                          |                                                                                                                                      |                                  |                              |                                 |          |
| <b>Patient or population:</b> TOF patients with severe stenosis of RVOT                                                                                                                                                                                                                                        |                                          |                                                                                                                                      |                                  |                              |                                 |          |
| <b>Settings:</b>                                                                                                                                                                                                                                                                                               |                                          |                                                                                                                                      |                                  |                              |                                 |          |
| <b>Intervention:</b> TAP with monocusp                                                                                                                                                                                                                                                                         |                                          |                                                                                                                                      |                                  |                              |                                 |          |
| <b>Comparison:</b> TAP without monocusp                                                                                                                                                                                                                                                                        |                                          |                                                                                                                                      |                                  |                              |                                 |          |
| Outcomes                                                                                                                                                                                                                                                                                                       | Illustrative comparative risks* (95% CI) |                                                                                                                                      | Relative effect (95% CI)         | No of Participants (studies) | Quality of the evidence (GRADE) | Comments |
|                                                                                                                                                                                                                                                                                                                | Assumed risk<br>TAP without monocusp     | Corresponding risk<br>TAP with monocusp                                                                                              |                                  |                              |                                 |          |
| Cardiopulmonary bypass time (min)                                                                                                                                                                                                                                                                              |                                          | The mean cardiopulmonary bypass time (min) in the intervention groups was <b>23.18 higher</b><br>(17.93 to 28.42 higher)             |                                  | 472<br>(7 studies)           | ⊕⊕⊕⊖<br>very low <sup>1,2</sup> |          |
| Aortic cross-clamp time (min)                                                                                                                                                                                                                                                                                  |                                          | The mean aortic cross-clamp time (min) in the intervention groups was <b>14.01 higher</b><br>(3.37 lower to 31.39 higher)            |                                  | 472<br>(7 studies)           | ⊕⊕⊕⊖<br>very low <sup>1,3</sup> |          |
| Ventilation duration (h)                                                                                                                                                                                                                                                                                       |                                          | The mean ventilation duration (h) in the intervention groups was <b>13.68 lower</b><br>(31.56 lower to 4.2 higher)                   |                                  | 497<br>(7 studies)           | ⊕⊕⊕⊖<br>very low <sup>1,3</sup> |          |
| ICU stay (d)                                                                                                                                                                                                                                                                                                   |                                          | The mean icu stay (d) in the intervention groups was <b>1.43 lower</b><br>(2.11 to 0.76 lower)                                       |                                  | 471<br>(7 studies)           | ⊕⊕⊕⊖<br>low                     |          |
| Hospital stay (d)                                                                                                                                                                                                                                                                                              |                                          | The mean hospital stay (d) in the intervention groups was <b>0.25 higher</b><br>(3.03 lower to 3.53 higher)                          |                                  | 223<br>(3 studies)           | ⊕⊕⊕⊖<br>very low <sup>4</sup>   |          |
| Perioperative RVOT pressure gradient (mmHg)                                                                                                                                                                                                                                                                    |                                          | The mean perioperative rvot pressure gradient (mmhg) in the intervention groups was <b>0.38 lower</b><br>(3.28 lower to 2.52 higher) |                                  | 457<br>(6 studies)           | ⊕⊕⊕⊖<br>very low <sup>3</sup>   |          |
| Moderate or severe pulmonary regurgitation in perioperative period                                                                                                                                                                                                                                             | <b>Study population</b>                  |                                                                                                                                      | <b>OR 0.03</b><br>(0.01 to 0.12) | 626<br>(9 studies)           | ⊕⊕⊕⊖<br>low <sup>3,5</sup>      |          |
|                                                                                                                                                                                                                                                                                                                | <b>729 per 1000</b>                      | <b>75 per 1000</b><br>(26 to 244)                                                                                                    |                                  |                              |                                 |          |
|                                                                                                                                                                                                                                                                                                                | <b>Moderate</b>                          |                                                                                                                                      |                                  |                              |                                 |          |
|                                                                                                                                                                                                                                                                                                                | <b>684 per 1000</b>                      | <b>61 per 1000</b><br>(21 to 206)                                                                                                    |                                  |                              |                                 |          |

\*The basis for the **assumed risk** (e.g. the median control group risk across studies) is provided in footnotes. The **corresponding risk** (and its 95% confidence interval) is based on the assumed risk in the comparison group and the **relative effect** of the intervention (and its 95% CI).

**CI:** Confidence interval; **OR:** Odds ratio;

---

GRADE Working Group grades of evidence

**High quality:** Further research is very unlikely to change our confidence in the estimate of effect.

**Moderate quality:** Further research is likely to have an important impact on our confidence in the estimate of effect and may change the estimate.

**Low quality:** Further research is very likely to have an important impact on our confidence in the estimate of effect and is likely to change the estimate.

**Very low quality:** We are very uncertain about the estimate.

---

<sup>1</sup> The width of confidence interval is wide

<sup>2</sup> funnel demonstrated significant publication bias

<sup>3</sup> I<sup>2</sup> over 75%, which suggested significant heterogeneity

<sup>4</sup> No explanation was provided

<sup>5</sup> RR=0.14

---
